# Supplementary material for: Inhibition of MRN activity by a telomere protein motif
Source: PubMed Central journal article supplement (PMC8219681; doi:10.1038/s41467-021-24047-2), 2021-06-22
Supplement: 41467_2021_24047_MOESM1_ESM.pdf [file 41467_2021_24047_MOESM1_ESM.pdf]

**Inhibition of MRN activity by a telomere protein motif**

Supplementary Table 1.

**List of strains used in this study. All *S. cerevisiae* strains are in the W303 background. *K. lactis* strains are indicated by 'KL' in the number.**

|           |                                                                                                                                |                                                                         |
|-----------|--------------------------------------------------------------------------------------------------------------------------------|-------------------------------------------------------------------------|
| YAB0      | <i>MAT<sub>a</sub></i>                                                                                                         | Lab collection.                                                         |
| YAB1      | <i>MAT<sub>α</sub></i>                                                                                                         | Lab collection.                                                         |
| YAB594    | <i>MAT<sub>a</sub> bar1-D lys2::pGAL-ISceI ISceI::URA3::ISceI rad50S:URA3 [pAB2124]</i>                                        | This study.                                                             |
| YAB595    | <i>MAT<sub>a</sub> bar1-D lys2::pGAL-ISceI ISceI::URA3::ISceI::5UASGal4 [pAB2123]</i>                                          | This study.                                                             |
| YAB717    | <i>MAT<sub>a</sub> bar1-D lys2::pGAL-ISceI ISceI::URA3::ISceI::5UASGal4 [pAB2124]</i>                                          | This study.                                                             |
| YAB734    | <i>MAT<sub>a</sub> bar1-D lys2::pGAL-ISceI ISceI::URA3::ISceI [pAB2123]</i>                                                    | This study.                                                             |
| YAB781    | <i>MAT<sub>a</sub> bar1-D lys2::pGAL-ISceI ISceI::URA3::ISceI [pAB2124]</i>                                                    | This study.                                                             |
| YAB1517   | <i>MAT<sub>a</sub> ade2-1 his3-200 leu2-3,112 trp1-901 ura3-52 gal4-Δ gal80-Δ MET2::GAL7-lacZ LYS2::GAL1-HIS3 GAL2-ADE2</i>    | Lab collection.                                                         |
| YAB1759   | <i>MAT<sub>a</sub> rif2-min</i>                                                                                                | This study.                                                             |
| YAB1760   | <i>MAT<sub>a</sub> rif2-min</i>                                                                                                | This study.                                                             |
| YAB1761   | <i>MAT<sub>a</sub> bar1-D lys2::pGAL-ISceI ISceI::URA3::ISceI::5UASGal4</i>                                                    | Marcand, S., et al., <i>Genes Dev</i> 22, 1153-1158 (2008).             |
| YAB1764   | <i>MAT<sub>a</sub> bar1-D lys2::pGAL-ISceI ISceI::URA3::ISceI::5UASGal4 rif2::HPH</i>                                          | Marcand, S., et al., <i>Genes Dev</i> 22, 1153-1158 (2008).             |
| YAB1765   | <i>MAT<sub>a</sub> bar1-D lys2::pGAL-ISceI ISceI::URA3::ISceI</i>                                                              | Marcand, S., et al., <i>Genes Dev</i> 22, 1153-1158 (2008).             |
| YAB1778KL | <i>Mat<sub>a</sub> lysA1 trp1 leu2 metA1 uraA1 mre11::kanMX</i>                                                                | Stefan U. Åström.                                                       |
| YAB1789   | <i>MAT<sub>a</sub> bar1-D lys2::pGAL-ISceI ISceI::URA3::ISceI::5UASGal4 rif2-min</i>                                           | This study.                                                             |
| YAB1984   | <i>MAT<sub>a</sub> bar1-D lys2::pGAL-ISceI ISceI::URA3::ISceI::5UASGal4 tel1::kanMX</i>                                        | This study.                                                             |
| YAB1990   | <i>MAT<sub>α</sub>::loxP ade2::loxP leu2::pG-HO-L2 lys2::loxP mnt2::LYS2 mnt2::TG80-HO-CA80-ADE2</i>                           | Ribeyre, C. & Shore, D., <i>Nat Struct Mol Biol</i> 19, 307-313 (2012). |
| YAB1991   | <i>MAT<sub>α</sub>::loxP ade2::loxP leu2::pG-HO-L2 lys2::loxP mnt2::LYS2 mnt2::TG80-HO-CA80-ADE2 rif1::NatMX4</i>              | Ribeyre, C. & Shore, D., <i>Nat Struct Mol Biol</i> 19, 307-313 (2012). |
| YAB1992   | <i>MAT<sub>α</sub>::loxP ade2::loxP leu2::pG-HO-L2 lys2::loxP mnt2::LYS2 mnt2::TG80-HO-CA80-ADE2 rif2::KanMX4</i>              | Ribeyre, C. & Shore, D., <i>Nat Struct Mol Biol</i> 19, 307-313 (2012). |
| YAB1993   | <i>MAT<sub>α</sub>::loxP ade2::loxP leu2::pG-HO-L2 lys2::loxP mnt2::LYS2 mnt2::TG80-HO-CA80-ADE2 rif1::NatMX4 rif2::KanMX4</i> | Ribeyre, C. & Shore, D., <i>Nat Struct Mol Biol</i> 19, 307-313 (2012). |
| YAB2004KL | <i>MAT<sub>α</sub> ade2-202 ura3</i>                                                                                           | Dudy Tzfati.                                                            |
| YAB2029   | <i>MAT<sub>a</sub> xrs2-664</i>                                                                                                | Shima, et al., <i>Genetics</i> 170, 71-85 (2005).                       |

|           |                                                                                                                                   |             |
|-----------|-----------------------------------------------------------------------------------------------------------------------------------|-------------|
| YAB2035   | <i>MAT<math>\alpha</math>::loxP ade2::loxP leu2::pG-HO-L2 lys2::loxP mnt2::LYS2 mnt2::TG80-HO-CA80-ADE2 rif2-min</i>              | This study. |
| YAB2037   | <i>MAT<math>\alpha</math>::loxP ade2::loxP leu2::pG-HO-L2 lys2::loxP mnt2::LYS2 mnt2::TG80-HO-CA80-ADE2 rif1::NatMX4 rif2-min</i> | This study. |
| YAB2038   | <i>MAT<math>\alpha</math>::loxP ade2::loxP leu2::pG-HO-L2 lys2::loxP mnt2::LYS2 mnt2::TG80-HO-CA80-ADE2 rif1::NatMX4 rif2-min</i> | This study. |
| YAB2039   | <i>MAT<math>\alpha</math> rif2-min</i>                                                                                            | This study. |
| YAB2047   | <i>MAT<math>\alpha</math> xrs2::TRP1</i>                                                                                          | This study. |
| YAB2052   | <i>MAT<math>\alpha</math> rif2-min xrs2-664</i>                                                                                   | This study. |
| YAB2053   | <i>MAT<math>\alpha</math> rif2-min xrs2-664</i>                                                                                   | This study. |
| YAB2054   | <i>MAT<math>\alpha</math> rif2-min xrs2-664</i>                                                                                   | This study. |
| YAB2057   | <i>MAT<math>\alpha</math> rif2::ADE2</i>                                                                                          | This study. |
| YAB2058   | <i>MAT<math>\alpha</math> rif2::ADE2</i>                                                                                          | This study. |
| YAB2060   | <i>MAT<math>\alpha</math> rif2::ADE2</i>                                                                                          | This study. |
| YAB2065   | <i>MAT<math>\alpha</math> rif2::ADE2 xrs2::TRP1</i>                                                                               | This study. |
| YAB2067   | <i>MAT<math>\alpha</math> rif2::ADE2 xrs2::TRP1</i>                                                                               | This study. |
| YAB2106   | <i>MAT<math>\alpha</math> tel1::TRP1</i>                                                                                          | This study. |
| YAB2110   | <i>MAT<math>\alpha</math> rif2::ADE2 tel1::TRP1</i>                                                                               | This study. |
| YAB2111   | <i>MAT<math>\alpha</math> rif2::ADE2 tel1::TRP1</i>                                                                               | This study. |
| YAB2112   | <i>MAT<math>\alpha</math> rif2-min xrs2::TRP1</i>                                                                                 | This study. |
| YAB2114   | <i>MAT<math>\alpha</math> rif2-min tel1::TRP1</i>                                                                                 | This study. |
| YAB2115   | <i>MAT<math>\alpha</math> rif2-min tel1::TRP1</i>                                                                                 | This study. |
| YAB2116   | <i>MAT<math>\alpha</math> rif2-min xrs2::TRP1</i>                                                                                 | This study. |
| YAB2143KL | <i>trp1 leu2 met? ura3 rif1::URA3</i>                                                                                             | This study. |
| YAB2144KL | <i>lysA1 leu2 met? ura3 rif1::URA3</i>                                                                                            | This study. |
| YAB2145KL | <i>leu2 met? ura3 mre11::kanMX orc4-min rif1::URA3</i>                                                                            | This study. |

|           |                                                                                                   |                                                        |
|-----------|---------------------------------------------------------------------------------------------------|--------------------------------------------------------|
| YAB2155KL | <i>lysA1 leu2 met? ura3 orc4-min rif1::URA3</i>                                                   | This study.                                            |
| YAB2157KL | <i>MAT<sub>a</sub> ade2-Δ ura3</i>                                                                | Jürgen J. Heinisch.                                    |
| YAB2158KL | <i>MAT<sub>α</sub> ade2-Δ ura3</i>                                                                | Jürgen J. Heinisch.                                    |
| YAB2171KL | <i>lysA1 met? ura3 mre11::kanMX</i>                                                               | Carter, et al., <i>Genetics</i> 175, 1035-1045 (2007). |
| YAB2174KL | <i>MAT<sub>α</sub> ura3 orc4-min</i>                                                              | This study.                                            |
| YAB2175KL | <i>MAT<sub>a</sub> ura3 orc4-min</i>                                                              | This study.                                            |
| YAB2176KL | <i>MAT<sub>a</sub> ura3 orc4-min</i>                                                              | This study.                                            |
| YAB2177KL | <i>MAT<sub>α</sub> ura3 orc4-min</i>                                                              | This study.                                            |
| YAB2188KL | <i>MAT<sub>α</sub> ura3 orc4-min rif1::URA3</i>                                                   | This study.                                            |
| YAB2189   | <i>MAT<sub>a</sub> RAD50:URA3</i>                                                                 | This study.                                            |
| YAB2190   | <i>MAT<sub>a</sub> his3::Pgal-MIN RAD50:URA3</i>                                                  | This study.                                            |
| YAB2191   | <i>MAT<sub>a</sub> his3::Pgal-MINmut RAD50:URA3</i>                                               | This study.                                            |
| YAB2192   | <i>MAT<sub>a</sub> rad50S:URA3</i>                                                                | This study.                                            |
| YAB2193KL | <i>lysA1 met? ura3 mre11::kanMX orc4-min</i>                                                      | This study.                                            |
| YAB2194   | <i>MAT<sub>a</sub> his3::Pgal-MIN rad50S:URA3</i>                                                 | This study.                                            |
| YAB2195   | <i>MAT<sub>a</sub> his3::Pgal-MIN rad50S:URA3</i>                                                 | This study.                                            |
| YAB2196   | <i>MAT<sub>a</sub> his3::Pgal-MINmut rad50S:URA3</i>                                              | This study.                                            |
| YAB2197KL | <i>leu2 met? trp1 ura3 mre11::kanMX rif1::URA3</i>                                                | This study.                                            |
| YAB2199KL | <i>leu2 met? ura3 mre11::kanMX orc4-min rif1::URA3</i>                                            | This study.                                            |
| YAB2200   | <i>MAT<sub>a</sub> bar1-D lys2::pGAL-ISceI ISceI::URA3::ISceI rad50S:URA3 [pAB2123]</i>           | This study.                                            |
| YAB2201   | <i>MAT<sub>a</sub> rif2::ADE2</i>                                                                 | This study.                                            |
| YAB2204   | <i>MAT<sub>a</sub> bar1-D lys2::pGAL-ISceI ISceI::URA3::ISceI::5UASGal4 rad50S:URA3 [pAB2124]</i> | This study.                                            |
| YAB2205   | <i>MAT<sub>a</sub> bar1-D lys2::pGAL-ISceI ISceI::URA3::ISceI::5UASGal4 rad50S:URA3 [pAB2123]</i> | This study.                                            |

|           |                                                                             |             |
|-----------|-----------------------------------------------------------------------------|-------------|
| YAB2284   | <i>MAT<math>\alpha</math> rif2-min tel1::TRP1 rad50S:URA3</i>               | This study. |
| YAB2285   | <i>MAT<math>\alpha</math> rif2::ADE2 tel1::TRP1 rad50S:URA3</i>             | This study. |
| YAB2286   | <i>MAT<math>\alpha</math> tel1::TRP1 rad50S:URA3</i>                        | This study. |
| YAB2287   | <i>MAT<math>\alpha</math> rif2-min rad50S:URA3</i>                          | This study. |
| YAB2288   | <i>MAT<math>\alpha</math> rif2-min rad50S:URA3</i>                          | This study. |
| YAB2289   | <i>MAT<math>\alpha</math> rif2-min rad50S:URA3</i>                          | This study. |
| YAB2290   | <i>MAT<math>\alpha</math> rif2::ADE2 rad50S:URA3</i>                        | This study. |
| YAB2291   | <i>MAT<math>\alpha</math> rif2::ADE2 rad50S:URA3</i>                        | This study. |
| YAB2292   | <i>MAT<math>\alpha</math> rif2::ADE2 rad50S:URA3</i>                        | This study. |
| YAB2293   | <i>MAT<math>\alpha</math> rad50S:URA3</i>                                   | This study. |
| YAB2294   | <i>MAT<math>\alpha</math> rad50S:URA3</i>                                   | This study. |
| YAB2295   | <i>MAT<math>\alpha</math> his3::Pgal-MIN</i>                                | This study. |
| YAB2296   | <i>MAT<math>\alpha</math> his3::Pgal-MINmut</i>                             | This study. |
| YAB2297   | <i>MAT<math>\alpha</math> his3::Pgal-MIN</i>                                | This study. |
| YAB2298   | <i>MAT<math>\alpha</math> his3::Pgal-MINmut</i>                             | This study. |
| YAB2310KL | <i>MAT<math>\alpha</math> ade2-<math>\Delta</math> leu2 ura3 rif1::URA3</i> | This study. |
| YAB2311KL | <i>MAT<math>\alpha</math> ade2-<math>\Delta</math> leu2 ura3 rif1::URA3</i> | This study. |
| YAB2349KL | <i>MAT<math>\alpha</math> ura3 orc4-min rif1::URA3</i>                      | This study. |
| YAB2351   | <i>MAT<math>\alpha</math> rad50S:URA3</i>                                   | This study. |
| YAB2352KL | <i>MAT<math>\alpha</math> ura3 orc4-min rif1::URA3</i>                      | This study. |
| YAB2353KL | <i>MAT<math>\alpha</math> ura3 orc4-min rif1::URA3</i>                      | This study. |
| YAB2355KL | <i>MAT<math>\alpha</math> ura3 orc4-min rif1::URA3</i>                      | This study. |
